# Supplementary material
Source: publisher site journal article supplement (https://www.dovepress.com/get_supplementary_file.php?f=350047.docx)
Supplement: Supplementary file 1 [file get_supplementary_file.php]

Supplementary File

**Supplementary Table 1** **NGS Sequence number results(defined as pathogens)**

| Case NO. | Specimen Types | NGS Sequence number results(defined as pathogens) |
| --- | --- | --- |
| 3 | BALF | Pneumocystis jiroveci(485071) |
| 5 | BALF | Pneumocystis jiroveci(197356) |
| 6 | BALF | Pneumocystis jiroveci(13140、Cryptococcosisneoformans(24) |
| 7 | BALF | Pneumocystis jiroveci(161144)、CMV virus(119) |
| 9 | BALF | Cyanobacteriummarneffei(1075)、CMV virus(1337) |
| 10 | BALF | Cyanobacteriummarneffei（1365） |
| 11 | BALF | Cryptococcosisneoformans（2735） |
| 12 | BALF | Pneumocystis jiroveci(205658)、TropherymaWhipplei（115） |
| 13 | BALF | Pneumocystis jiroveci（11） |
| 14 | BALF | Pneumocystis jiroveci（81822）、CMV virus(125) |
| 45 | BALF | Mycobacterium tuberculosis（30） |
| 46 | BALF | Mycobacterium kansasii(1) |
| 18 | BLOOD | Cyanobacteriummarneffei(7661) |
| 21 | BLOOD | Mycobacteriumavium-intracellulare（3） |
| 23 | CSF | Cryptococcosisneoformans(245) |
| 24 | CSF | Cryptococcosisneoformans(4385)、Staphylococcus aureus（33） |
| 25 | CSF | Cryptococcosisneoformans（9） |
| 27 | CSF | Mycobacterium tuberculosis(1) |
| 28 | CSF | JC virus(4) |
| 29 | CSF | Cryptococcosisneoformans（105）、Mycobacterium tuberculosis（1） |
| 31 | CSF | Mycobacterium tuberculosis（5） |
| 32 | CSF | Mycobacterium haemophilus(1)、Cryptococcosisneoformans(1) |
| 34 | CSF | Cryptococcosisneoformans(1010) |
| 36 | CSF | Mycobacteriumavium-intracellulare（2）、Mycobacterium abscessus（1） |
| 37 | LNT | Herpesvirus 8（480） |
| 38 | LNT | Mycobacterium columbia（208891）、Mycobacterium paraintracellulare（426）、Mycobacterium vulneris（403）、Cyanobacteriummarneffei（231402） |
| 39 | LNT | Cyanobacteriummarneffei（17920） |
| 40 | LNT | Mycobacteriumavium-intracellulare（36576）、Mycobacterium parascrofula（107） |
| 41 | pus | Mycobacterium tuberculosis（11） |
| 44 | sputum | Mycobacterium tuberculosis（8） |

BALF：bronchoalveolar lavage fluid； CSF:cerebrospinal fluid；LNT：lymph node tissue
